# Supplementary material for: Stimulated Leaf Dark Respiration in Tomato in an Elevated Carbon Dioxide Atmosphere
Source: PubMed Central journal article supplement — Sci Rep. 2013 Dec 5;3:3433. doi: 10.1038/srep03433 (PMC3852141; doi:10.1038/srep03433), 2013-12-05
Supplement: srep03433-s1.pdf [file srep03433-s1.pdf]

**Title: Stimulated Leaf Dark Respiration in Tomato in an Elevated Carbon Dioxide Atmosphere**

Xin Li, Guanqun Zhang, Bo Sun, Shuai Zhang, Yiqing Zhang, Yangwenke Liao, Yanhong Zhou, Xiaojian Xia, Kai Shi, Jingquan Yu

**Supplementary Table S1.** The Affymetrix probe ID, annotation and treatment response (%) of transcripts whose abundance was significantly altered in tomato by grown at elevated CO<sub>2</sub> concentration (800 μmol mol<sup>-1</sup>) compared to ambient CO<sub>2</sub> concentration (380 μmol mol<sup>-1</sup>).

| <b>Affymetrix ID</b>                    | <b>Annotation</b>                               | <b>%</b> | <b>p</b> |
|-----------------------------------------|-------------------------------------------------|----------|----------|
| <b>Glycolysis</b>                       |                                                 |          |          |
| Les.4797.1.S1_at                        | phosphoglucose isomerase 1                      | -15.93   | 0.0238   |
| LesAffx.51723. 1.S1_at                  | 6-phosphofructokinase                           | 58.72    | 0.0304   |
| Les.3174.1.S1_at                        | fructose-bisphosphate aldolase, class I         | 73.49    | 0.0268   |
| LesAffx.56363. 1.S1_at                  | triose phosphate isomerase                      | 69.8     | 0.0319   |
| Les.186.1.S1_at                         | glyceraldehyde-3-phosphate dehydrogenase        | 75.21    | 0.0497   |
| Les.4336.3.S1_at                        | phosphoglycerate kinase                         | 81.62    | 0.02     |
| Les.303.1.S1_at                         | bifunctional enolase2                           | 43.56    | 0.026    |
| Les.3932.1.S1_at                        | bifunctional enolase2                           | 40.71    | 0.0199   |
| Les.3932.2.S1_at                        | bifunctional enolase2                           | 18.68    | 0.0352   |
| Les.3932.3.S1_at                        | bifunctional enolase2                           | -35.29   | 0.0106   |
| Les.5649.1.S1_at                        | plastidial pyruvate kinase 3                    | 50.79    | 0.0331   |
| <b>tricarboxylic acid ( TCA ) cycle</b> |                                                 |          |          |
| Les.3167.1.S1_at                        | pyruvate dehydrogenase complex E1 alpha subunit | 51.61    | 0.0197   |

|                  |                                                             |        |        |
|------------------|-------------------------------------------------------------|--------|--------|
| Les.4801.1.S1_at | pyruvate dehydrogenase complex                              | 18.57  | 0.0451 |
| Les.502.1.S1_at  | citrate synthase 2                                          | 39.59  | 0.042  |
| Les.502.2.S1_at  | citrate synthase 3                                          | 40.68  | 0.0415 |
| Les.2975.2.S1_at | aconitate hydratase 2                                       | 180.72 | 0.0004 |
| Les.461.1.S1_at  | isocitrate dehydrogenase (NAD <sup>+</sup> )                | 44.11  | 0.0114 |
| Les.2541.2.S1_at | $\alpha$ -oxoglutarate dehydrogenase E1 component           | 33.91  | 0.0103 |
| Les.4961.1.S1_at | $\alpha$ -oxoglutarate dehydrogenase complex 1              | 47.13  | 0.0189 |
| Les.5871.1.S1_at | succinate dehydrogenase (ubiquinone) flavoprotein subunit 1 | 67.44  | 0.0001 |
| Les.5871.2.S1_at | succinate dehydrogenase (ubiquinone) flavoprotein subunit 1 | 67.66  | 0.0138 |
| Les.2307.1.S1_at | succinate dehydrogenase (ubiquinone) flavoprotein subunit 2 | 45.58  | 0.0011 |
| Les.5148.1.S1_at | fumarate hydratase, class II                                | 18.87  | 0.0364 |
| Les.3378.1.S1_at | malate dehydrogenase                                        | 24.2   | 0.0349 |
| Les.2758.1.S1_at | ATP-citrate lyase                                           | 45.29  | 0.0393 |

#### **mitochondrial electron transport chain (miETC)**

|                       |                                                            |        |        |
|-----------------------|------------------------------------------------------------|--------|--------|
| LesAffx.11839.1.S1_at | NADH dehydrogenase I subunit 3                             | -37.12 | 0.0003 |
| LesAffx.21457.1.S1_at | NADH dehydrogenase Fe-S protein 4                          | 50.58  | 0.0093 |
| LesAffx.892.1.S1_at   | NADH dehydrogenase Fe-S protein 7                          | 59.5   | 0.0003 |
| Les.5772.1.S1_at      | NADH dehydrogenase 1 alpha sub complex 1                   | 28.15  | 0.0396 |
| Les.3026.1.S1_at      | NADH dehydrogenase 1 alpha sub complex 2                   | 39.02  | 0.0016 |
| Les.3102.1.S1_at      | NADH dehydrogenase (ubiquinone) 1 alpha/beta sub complex 1 | 42.12  | 0.0003 |

|                       |                                                                          |        |        |
|-----------------------|--------------------------------------------------------------------------|--------|--------|
| Les.5871.1.S1_at      | succinate dehydrogenase<br>(ubiquinone) flavoprotein subunit 1           | 67.44  | 0.0002 |
| Les.5817.2.S1_at      | succinate dehydrogenase<br>(ubiquinone) flavoprotein subunit 1           | 67.66  | 0.0358 |
| Les.2307.1.S1_at      | succinate dehydrogenase<br>(ubiquinone) flavoprotein subunit 2           | 45.58  | 0.0011 |
| Les.4223.1.S1_at      | alternative oxidase 1b                                                   | 245.29 | 0.0003 |
| Les.4222.1.S1_at      | alternative oxidase 1b                                                   | 187.7  | 0.0002 |
| Les.4337.1.S1_at      | alternative oxidase 1c                                                   | 14.73  | 0.0337 |
| Les.4328.1.S1_at      | alternative oxidase 2                                                    | 69.59  | 0.0019 |
| Les.3447.2.S1_at      | ubiquinol-cytochrome <i>c</i> reductase<br>hinge protein                 | 70.54  | 0.0497 |
| Les.4516.1.S1_at      | ubiquinol-cytochrome <i>c</i> reductase<br>iron-sulfur subunit           | 32.89  | 0.016  |
| Les.4931.1.S1_at      | ubiquinol-cytochrome <i>c</i> reductase<br>cytochrome <i>c</i> 1 subunit | -18.34 | 0.0241 |
| Les.4271.1.S1_at      | cytochrome <i>c</i> oxidase subunit 1                                    | 82.72  | 0.0001 |
| LesAffx.64305.1.S1_at | cytochrome <i>c</i> oxidase subunit 6b-1<br>like                         | 54.94  | 0.0132 |
| Les.199.2.S1_at       | cytochrome <i>c</i> oxidase subunit 6b-1<br>like                         | 13.78  | 0.0465 |
| Les.2873.1.S1_at      | cytochrome <i>c</i> oxidase subunit 5b-2                                 | 243.14 | 0.0016 |
| Les.5834.1.S1_at      | ATP synthase CF1 alpha chain                                             | -44.26 | 0.0004 |
| Les.3196.1.S1_at      | ATP synthase subunit beta-2                                              | 53.05  | 0.0006 |
| LesAffx.53546.1.S1_at | ATP synthase subunit O                                                   | 49.84  | 0.0003 |
| Les.4283.1.S1_at      | ATP synthase subunit delta                                               | 38.82  | 0.0002 |
| LesAffx.29304.1.S1_at | ATP synthase subunit epsilon                                             | 69.33  | 0.0344 |
| Les.3691.1.S1_at      | UCP protein                                                              | 83.97  | 0.0014 |
